# Supplementary material for: Ubrogepant Is Not Associated With Clinically Meaningful Elevations of Alanine Aminotransferase in Healthy Adult Males
Source: PubMed Central journal article supplement — Clin Transl Sci. 2020 Jan 3;13(3):462–72. doi: 10.1111/cts.12728 (PMC7214647; doi:10.1111/cts.12728), 2020-01-03
Supplement: CTS-13-462-s001.pdf [file CTS-13-462-s001.pdf]

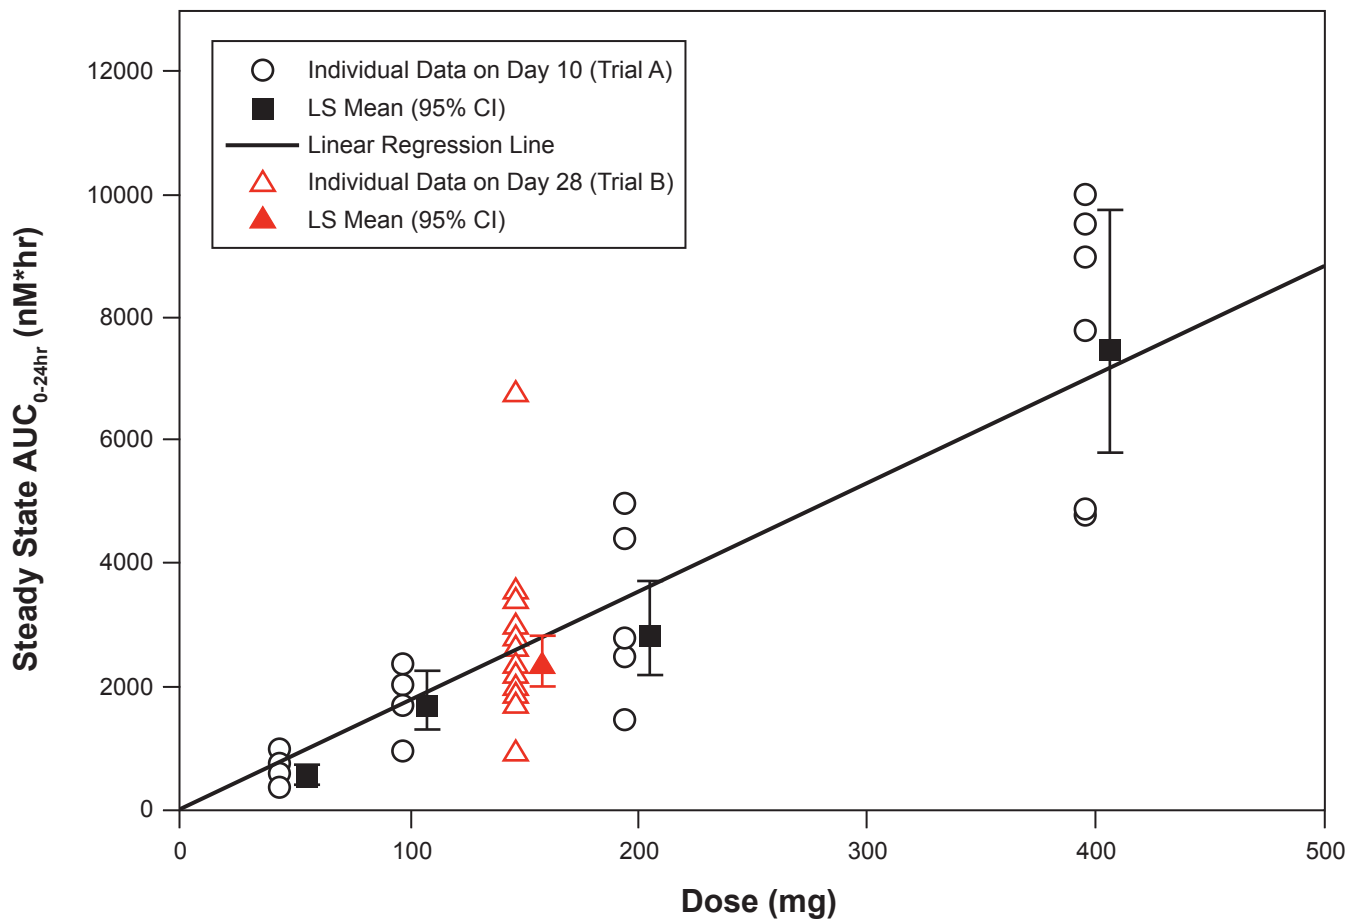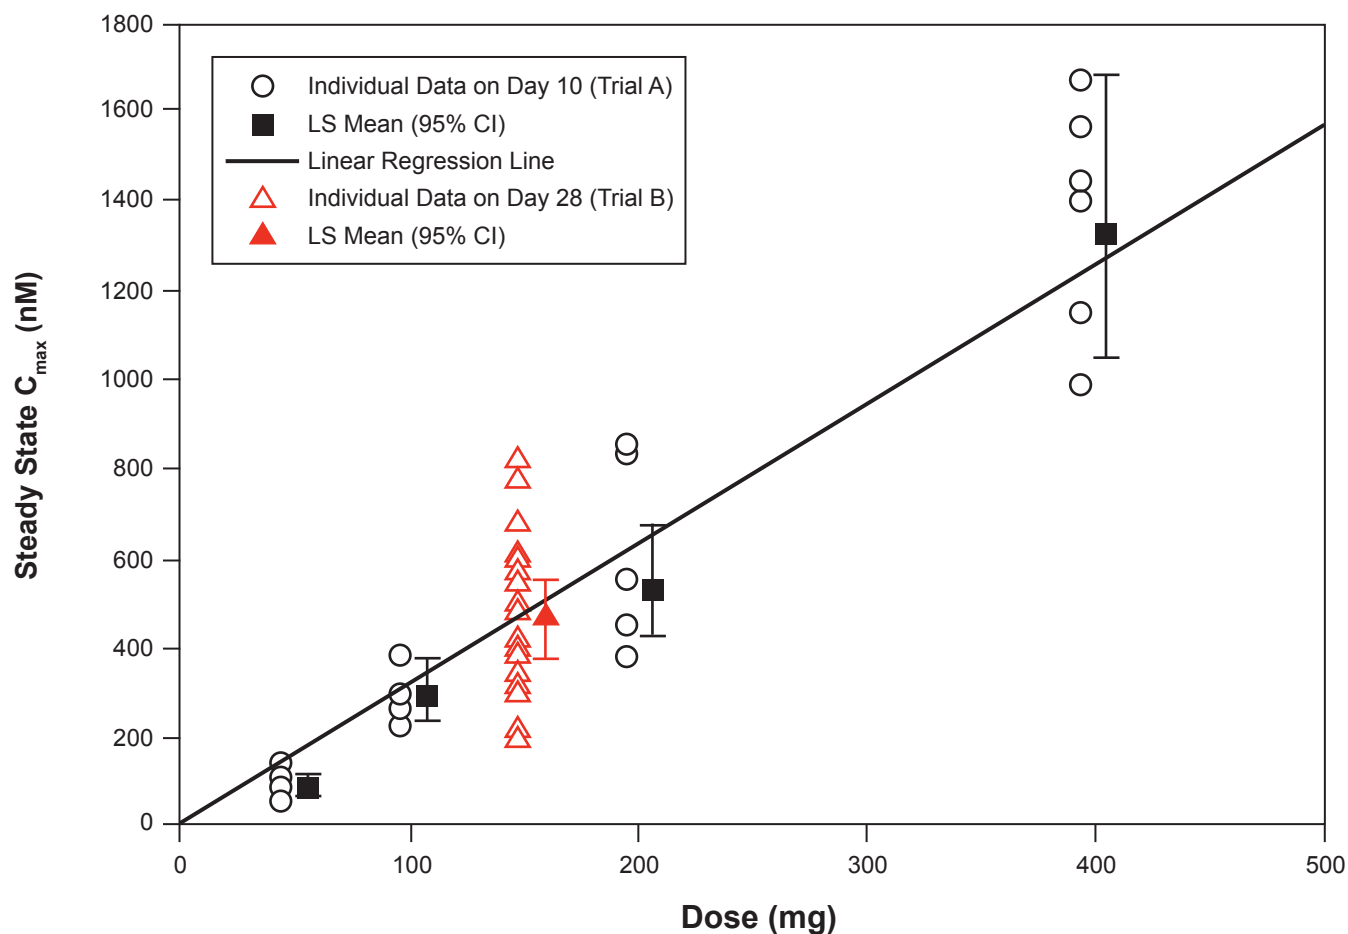

**Figure S1.** Comparison of mean  $AUC_{0-24hr}$  and  $C_{max}$  of ubrogepant vs dose following administration of multiple oral doses in healthy male participants.  $AUC_{0-24hr}$ , area under the curve from 0 through 24 hours;  $C_{max}$ , maximum plasma concentration.
