# Supplementary material for: Ubrogepant Is Not Associated With Clinically Meaningful Elevations of Alanine Aminotransferase in Healthy Adult Males
Source: PubMed Central journal article supplement — Clin Transl Sci. 2020 Jan 3;13(3):462–72. doi: 10.1111/cts.12728 (PMC7214647; doi:10.1111/cts.12728), 2020-01-03
Supplement: CTS-13-462-s003.pdf [file CTS-13-462-s003.pdf]

**Table S2** Adverse events reported by  $\geq 1$  participant in Trial A (SD-OCT formulation)

| Preferred Term, n                               | Trial A Part 1<br>(Single dose of ubrogepant) |                     |                   |                   |                  | Trial A Part 2<br>(Once-daily ubrogepant for 10 days) |                   |                   |                   |                  |
|-------------------------------------------------|-----------------------------------------------|---------------------|-------------------|-------------------|------------------|-------------------------------------------------------|-------------------|-------------------|-------------------|------------------|
|                                                 | 100 mg<br>(n = 6)                             | 100 mg<br>Fed (n=6) | 200 mg<br>(n = 6) | 400 mg<br>(n = 6) | Placebo<br>(n=6) | 40 mg<br>(n = 6)                                      | 100 mg<br>(n = 6) | 200 mg<br>(n = 6) | 400 mg<br>(n = 6) | Placebo<br>(n=8) |
| <b>Participants with <math>\geq 1</math> AE</b> | <b>1</b>                                      | <b>1</b>            | <b>2</b>          | <b>0</b>          | <b>2</b>         | <b>2</b>                                              | <b>3</b>          | <b>2</b>          | <b>4</b>          | <b>5</b>         |
| Vessel puncture site hematoma                   | 1                                             | 0                   | 0                 | 0                 | 0                | 0                                                     | 0                 | 0                 | 0                 | 0                |
| Vessel puncture site paresthesia                | 1                                             | 0                   | 0                 | 0                 | 0                | 0                                                     | 0                 | 0                 | 0                 | 0                |
| Influenza like illness                          | 0                                             | 0                   | 1                 | 0                 | 0                | 0                                                     | 0                 | 1                 | 0                 | 0                |
| Musculoskeletal stiffness                       | 0                                             | 1                   | 0                 | 0                 | 0                | 0                                                     | 0                 | 0                 | 0                 | 0                |
| Somnolence                                      | 0                                             | 0                   | 1                 | 0                 | 1                | 0                                                     | 0                 | 0                 | 0                 | 0                |
| Nasopharyngitis                                 | 0                                             | 0                   | 0                 | 0                 | 1                | 2                                                     | 0                 | 1                 | 0                 | 0                |
| Headache                                        | 0                                             | 0                   | 0                 | 0                 | 1                | 0                                                     | 0                 | 0                 | 1                 | 2                |
| Puncture site pain                              | 0                                             | 0                   | 0                 | 0                 | 0                | 1                                                     | 0                 | 0                 | 0                 | 0                |
| Nausea                                          | 0                                             | 0                   | 0                 | 0                 | 0                | 0                                                     | 1                 | 0                 | 1                 | 2                |
| Vomiting                                        | 0                                             | 0                   | 0                 | 0                 | 0                | 0                                                     | 1                 | 0                 | 0                 | 1                |
| Fatigue                                         | 0                                             | 0                   | 0                 | 0                 | 0                | 0                                                     | 1                 | 0                 | 0                 | 0                |
| Diarrhea                                        | 0                                             | 0                   | 0                 | 0                 | 0                | 0                                                     | 0                 | 1                 | 0                 | 2                |

|                                 |   |   |   |   |   |   |   |   |   |   |
|---------------------------------|---|---|---|---|---|---|---|---|---|---|
| Gastroesophageal reflux disease | 0 | 0 | 0 | 0 | 0 | 0 | 0 | 2 | 0 | 0 |
| Abdominal discomfort            | 0 | 0 | 0 | 0 | 0 | 0 | 0 | 0 | 1 | 0 |
| Abdominal pain                  | 0 | 0 | 0 | 0 | 0 | 0 | 0 | 0 | 0 | 1 |
| Abdominal pain upper            | 0 | 0 | 0 | 0 | 0 | 0 | 0 | 0 | 1 | 1 |
| Application site irritation     | 0 | 0 | 0 | 0 | 0 | 0 | 0 | 0 | 1 | 0 |
| Herpes simplex                  | 0 | 0 | 0 | 0 | 0 | 0 | 0 | 0 | 1 | 0 |
| Dry throat                      | 0 | 0 | 0 | 0 | 0 | 1 | 0 | 0 | 0 | 0 |
| Hand fracture                   | 0 | 0 | 0 | 0 | 0 | 0 | 1 | 0 | 0 | 0 |
| Nail injury                     | 0 | 0 | 0 | 0 | 0 | 0 | 1 | 0 | 0 | 0 |
| Wound                           | 0 | 0 | 0 | 0 | 0 | 0 | 1 | 0 | 0 | 0 |
| Oropharyngeal pain              | 0 | 0 | 0 | 0 | 0 | 0 | 0 | 1 | 0 | 0 |
| Arthropod bite                  | 0 | 0 | 0 | 0 | 0 | 0 | 0 | 0 | 1 | 0 |
| Pain in extremity               | 0 | 0 | 0 | 0 | 0 | 0 | 0 | 0 | 0 | 1 |
| Dizziness postural              | 0 | 0 | 0 | 0 | 0 | 0 | 0 | 0 | 0 | 2 |
| Presyncope                      | 0 | 0 | 0 | 0 | 0 | 0 | 0 | 0 | 0 | 1 |
| Syncope                         | 0 | 0 | 0 | 0 | 0 | 0 | 0 | 0 | 0 | 1 |

Note: 100 mg DFC and 40 mg HME formulation data not shown for Trial A.
