# Supplementary material for: Ubrogepant Is Not Associated With Clinically Meaningful Elevations of Alanine Aminotransferase in Healthy Adult Males
Source: PubMed Central journal article supplement — Clin Transl Sci. 2020 Jan 3;13(3):462–72. doi: 10.1111/cts.12728 (PMC7214647; doi:10.1111/cts.12728), 2020-01-03
Supplement: CTS-13-462-s004.pdf [file CTS-13-462-s004.pdf]

**Table S3** Adverse events reported by  $\geq 1$  participant in Trial B

| Preferred Term, n                               | 150 mg<br>(n = 22) | Placebo (n=10) |
|-------------------------------------------------|--------------------|----------------|
| <b>Participants with <math>\geq 1</math> AE</b> | <b>16</b>          | <b>5</b>       |
| Contusion                                       | 5                  | 1              |
| Dizziness                                       | 5                  | 0              |
| Scratch                                         | 1                  | 2              |
| Excoriation                                     | 2                  | 1              |
| Fatigue                                         | 2                  | 0              |
| Nausea                                          | 2                  | 0              |
| Diarrhea                                        | 2                  | 0              |
| Somnolence                                      | 2                  | 0              |
| Increased appetite                              | 2                  | 0              |
| Eye pain                                        | 2                  | 0              |
| Vessel puncture site hematoma                   | 1                  | 1              |
| Rhinorrhea                                      | 1                  | 0              |
| Erythema                                        | 1                  | 0              |
| Lip blister                                     | 1                  | 0              |
| Flank pain                                      | 1                  | 0              |
| Sunburn                                         | 1                  | 0              |
| Nephrolithiasis                                 | 1                  | 0              |
| Depressed level of consciousness                | 1                  | 0              |
| Muscle spasm                                    | 1                  | 0              |

|                            |   |   |
|----------------------------|---|---|
| Neck pain                  | 1 | 0 |
| Abnormal sensation in eye  | 1 | 0 |
| Musculoskeletal stiffness  | 1 | 0 |
| Rash                       | 1 | 0 |
| Skin irritation            | 1 | 0 |
| Decreased appetite         | 1 | 0 |
| Infrequent bowel movements | 1 | 0 |
| Flatulence                 | 1 | 0 |
| Nodule                     | 1 | 0 |
| Pruritus                   | 1 | 0 |
| Pain in extremity          | 1 | 0 |
| Muscle tightness           | 1 | 0 |
| Myalgia                    | 0 | 1 |
| Muscle spasms              | 0 | 1 |
| Ocular hyperemia           | 0 | 1 |
| Sneezing                   | 0 | 1 |
| Local Swelling             | 0 | 1 |
| Edema peripheral           | 0 | 1 |
| Periorbital hematoma       | 0 | 1 |
| Nasal congestion           | 0 | 1 |
